# Supplementary material
Source: publisher site journal article supplement (https://www.dovepress.com/get_supplementary_file.php?f=397667.docx)
Supplement: Supplementary file 1 [file get_supplementary_file.php]

**Supplemental material:**

**Table S1: Gender distribution for never smoking and groups quartiles of smoking pack years**

| Variables | Never smokers (n=46) | | Q1 (n=76) | | Q2 (n=89) | | Q3 (n=87) | | Q4 (n=84) | |
| --- | --- | --- | --- | --- | --- | --- | --- | --- | --- | --- |
|  | Male (n=12) | Female (n=34) | Male (n=31) | Female (n=45) | Male (n=37) | Female (n=52) | Male (n=42) | Female (n=45) | Male (n=47) | Female (n=37) |
| Age (years) | 62.4±15.7 | 64.9±13.1 | 71.4±8.9 | 62.8±13.3 | 64.2±8.5 | 64.1±9.6 | 68.6±9.1 | 67.3±7.4 | 68.0±7.2 | 65.3±7.5 |
| BMI (kg/m2) | 29.1±5.5 | 33.1±10.2 | 28.9±4.9 | 28.2±5.8 | 28.5±5.5 | 27.1±7.1 | 25.9±4.3 | 27.8±6.6 | 27.1±6.4 | 30.4±8.7 |
| Smoking History |  |  |  |  |  |  |  |  |  |  |
| Ex-smoker (%) | n.a | n.a | 80.7 | 57.8 | 59.5 | 51.9 | 50 | 53.3 | 53.2 | 35.1 |
| Current smoker (%) | n.a | n.a | 19.3 | 42.2 | 40.5 | 48.1 | 50 | 46.7 | 46.8 | 64.9 |
| Time to quit smoking (mean years) | n.a | n.a | 28.6±18.3 | 13.0±15.1 | 11.7±12.5 | 10.7±11.3 | 9.7±11.9 | 5.2±7.2 | 7.0±7.1 | 4.1±7.4 |
| Cigarettes smoked per day (mean) | n.a | n.a | 17.7±7.2 | 12.6±2.3 | 20.5±2.3 | 22.1±6.3 | 23.6±6.2 | 23.1±5.9 | 41.7±15.9 | 38.4±10.7 |
| Duration of smoking (mean years) | n.a | n.a | 24.5±15.2 | 29.9±15.0 | 35.5±5.2 | 35.1±8.6 | 45.8±9.0 | 45.6±9.5 | 48.1±7.5 | 45.7±7.5 |
| Comorbidities |  |  |  |  |  |  |  |  |  |  |
| COPD (%) | 8.3 | 17.6 | 41.9 | 51.1 | 54.1 | 57.7 | 71.4 | 77.8 | 68.1 | 94.6 |
| CAD (%) | 16.7 | 17.6 | 54.8 | 37.8 | 29.7 | 25 | 52.4 | 26.7 | 42.5 | 40.5 |
| Other cancers (%) | 25 | 14.7 | 29.0 | 13.3 | 13.5 | 5.8 | 9.5 | 6.7 | 6.4 | 2.7 |
| Hypertension (%) | 50 | 67.6 | 70.9 | 68.9 | 83.8 | 57.7 | 69.0 | 62.2 | 78.7 | 72.9 |
| Hyperlipidemia (%) | 50 | 47.1 | 58.1 | 55.6 | 64.9 | 63.5 | 57.1 | 57.8 | 63.8 | 62.2 |
| PAD (%) | 0 | 0 | 9.7 | 11.1 | 8.1 | 7.7 | 21.4 | 22.2 | 14.9 | 16.2 |
| Home O2 use (%) | 0 | 3.0 | 9.7 | 6.7 | 13.5 | 13.5 | 9.5 | 26.7 | 23.4 | 18.9 |
| Lab findings |  |  |  |  |  |  |  |  |  |  |
| Total WBC (×109/L) | 7.3±2.4 | 8.3±4.0 | 7.1±1.8 | 7.7±2.2 | 8.0±2.6 | 7.9±2.0 | 7.8±2.4 | 8.3±3.0 | 8.0±1.9 | 8.4±2.2 |
| Absolute monocyte (x102/µL) | 5.0±1.0 | 5.1±1.6 | 6.0±2.3 | 5.9±2.0 | 7.2±2.4 | 6.7±1.9 | 7.3±2.6 | 7.0±1.6 | 7.8±2.0 | 7.2±1.6 |
| Percentage monocyt | 7.2±1.6 | 6.7±1.9 | 8.5±2.5 | 7.9±2.7 | 9.1±2.0 | 8.7±2.5 | 9.6±4.2 | 8.7±1.9 | 10.0±2.4 | 8.9±2.2 |
| Hemoglobin (g/dL) | 14.8±1.2 | 13.1±1.5 | 14.1±1.4 | 13.4±1.4 | 14.1±1.0 | 13.0±1.7 | 13.4±2.0 | 13.1±1.5 | 13.4±2.0 | 12.7±1.6 |
| Hematocrit (%) | 43.2±2.3 | 39.4±3.9 | 42.1±4.1 | 40.2±4.1 | 41.5±4.8 | 38.8±4.7 | 14.0±5.5 | 39.5±4.2 | 14.0±5.4 | 38.5±4.6 |
| PFT findings |  |  |  |  |  |  |  |  |  |  |
| FEV1, %predicted | 93.5±12.0 | 95.3±21.4 | 80.3±20.1 | 81.0±23.4 | 73.4±18.6 | 78.8±19.8 | 72.3±19.8 | 70.2±20.5 | 69.5±22.3 | 68.2±17.2 |
| FVC, %predicted | 97.5±17.8 | 91.1±22.7 | 87.8±17.5 | 88.8±17.2 | 83.2±15.2 | 87.4±19.4 | 84.4±15.8 | 80.7±15.9 | 86.1±20.6 | 77.6±16.1 |
| FEV1/FVC | 73.4±10.6 | 80.1±6.8 | 67.7±11.8 | 70.1±13.2 | 66.3±10.2 | 70.1±10.3 | 63.5±10.2 | 66.5±12.6 | 60.7±12.6 | 69.7±10.9 |
| RV, %predicted | 111.2±30.0 | 116.3±40.8 | 132.6±46.4 | 142.9±78.6 | 138.9±39.6 | 133.6±33.0 | 149.3±39.6 | 148.8±59.5 | 153.2±51.4 | 141.7±44.6 |
| TLC, %predicted | 101.2±14.8 | 102.4±20.5 | 100.6±17.8 | 110.4±31.9 | 101.8±13.5 | 108.4±16.5 | 103.4±15.2 | 109.6±20.8 | 109.1±20.0 | 106.3±16.0 |
| RV/TLV, %predicted | 103.3±16.5 | 110.5±23.3 | 121.1±27.8 | 124.0±25.8 | 134.0±26.1 | 120.4±20.2 | 134.3±33.4 | 128.6±28.5 | 132.41±28.3 | 132.2±19.9 |
| DLCO, %predicted | 93.3±31.0 | 93.2±19.7 | 77.4±23.5 | 66.6±20.4 | 71.8±18.1 | 66.6±18.2 | 64.9±14.4 | 60.3±17.9 | 64.9±21.1 | 57.8±16.9 |
| Radiologic Findings |  |  |  |  |  |  |  |  |  |  |
| Any emphysema (%) | 25 | 8.8 | 83.9 | 75.6 | 94.6 | 98.1 | 97.6 | 100 | 100 | 97.3 |
| Centrilobular emphysema (%) | 16.7 | 8.8 | 77.4 | 68.9 | 89.2 | 84.6 | 85.7 | 86.7 | 95.7 | 91.9 |
| Paraseptal emphysema (%) | 8.3 | 0 | 25.8 | 22.2 | 43.2 | 40.4 | 33.3 | 40 | 53.2 | 37.8 |
| Any ILA (%) | 41.7 | 35.3 | 58.1 | 42.2 | 43.2 | 40.4 | 45.2 | 48.9 | 31.9 | 54.0 |
| Any ILD (%) | 0 | 0 | 12.9 | 11.1 | 16.2 | 23.1 | 23.8 | 20 | 31.9 | 27.0 |
| Histology Findings |  |  |  |  |  |  |  |  |  |  |
| Emphysema (%) | 41.7 | 23.5 | 64.5 | 60 | 70.3 | 84.6 | 83.3 | 88.9 | 93.6 | 83.8 |
| Fibrosis (%) | 16.7 | 11.8 | 19.4 | 8.9 | 56.8 | 30.8 | 26.2 | 24.4 | 25.5 | 40.5 |
| PBM (%) | 0 | 2.9 | 9.7 | 6.7 | 16.2 | 15.4 | 7.1 | 11.1 | 6.4 | 8.1 |
| OP (%) | 8.3 | 5.9 | 3.2 | 6.7 | 10.8 | 5.8 | 7.1 | 8.9 | 10.6 | 8.1 |
| RB-ILD (%) | 0 | 0 | 9.7 | 13.3 | 13.5 | 9.6 | 16.7 | 28.9 | 21.3 | 10.8 |
| DIP (%) | 0 | 0 | 0 | 4.4 | 2.7 | 9.6 | 26.2 | 2.2 | 4.3 | 5.4 |
| Anthracosis (%) | 50 | 29.4 | 54.8 | 53.3 | 64.9 | 55.8 | 76.2 | 64.4 | 80.8 | 72.9 |
| Primary lung cancer on resected nodule (%) | 58.3 | 79.4 | 80.7 | 88.9 | 78.4 | 90.4 | 85.7 | 93.3 | 91.5 | 91.9 |
| AAH (%) | 8.3 | 11.8 | 6.4 | 8.9 | 2.7 | 3.8 | 0 | 0 | 4.3 | 5.4 |
| Mortality (%) | 8.3 | 2.9 | 12.9 | 15.6 | 29.3 | 17.3 | 35.7 | 26.7 | 25.5 | 24.3 |

Abbreviations: AAH= atypical adenomatous hyperplasia, CAD=coronary artery disease, COPD= chronic obstructive pulmonary disease, DLCO= diffusion capacity of carbon monoxide, DIP=desquamative interstitial pneumonia, FEV1= forced expiratory volume in one second, FVC= forced vital capacity, ILA= interstitial lung abnormality, ILD= interstitial lung disease, OP= organizing pneumonia, PAD= peripheral artery disease, PBM= peribronchiolar metaplasia, PFT= pulmonary function test, RB-ILD= respiratory bronchiolitis- interstitial lung disease, RV= residual volume, TLC= total lung capacity

**Table S2:**

Logistic regression models developed to include current smoking (CS), composite pack years (CPY), % monocyte count and % predicted DLCO<70. CPY were characterized as ≥10 or 20 or 30 or 40 or 50 in chronological order for models #1 to 5, respectively.

* denotes predictors with trend towards significance.

|  | Model 1 | Model 2 | Model 3 | Model 4 | Model 5 |
| --- | --- | --- | --- | --- | --- |
| AAH | PY≥10: OR 0.23  [0.06 – 0.88], p=.032 | PY≥20*: OR 0.33  [0.10 – 1.10], p=.072 | PY≥30: OR 0.25  [0.08 – 0.76], p=.014 | -- | -- |
| Lung cancer | PY≥10: OR 2.36  [1.02 – 5.49], p=.045 | PY≥20: OR 2.19  [1.04 – 4.60], p=.039 | -- | -- | -- |
| PBM | -- | -- | DLCO<70*: OR 1.77  [0.98 – 3.23], p=.058 | DLCO<70*: OR 1.87 [0.93 – 3.78], p=.078 | DLCO<70*: OR 1.88  [0.93 – 3.79], p=.076 |
| Anthracosis | PY≥10: OR 2.97  [1.53 – 5.78], p=.001  %mono*: OR 1.10  [0.99 – 1.20], p=.051 | PY≥20: OR 2.26  [1.30 – 3.96], p=.004  %mono: OR 1.11  [1.01 – 1.22], p=.026 | PY≥30: OR 2.16  [1.32 – 3.51], p=.002  %mono: OR 1.11  [1.01 – 1.21], p=.028 | PY≥40: OR 1.83  [1.16 – 2.88], p=.009  %mono: OR 1.12  [1.02 – 1.23], p=.013 | PY≥50: OR 2.41  [1.48 – 3.93], p=.0004  %mono: OR 1.13  [1.03 – 1.23], p=.010 |
| OP | %mono: OR 1.17  [1.03 – 1.32], p=.015 | %mono: OR 1.17  [1.03 – 1.32], p=.013 | %mono: OR 1.16  [1.03 – 1.31], p=.017 | %mono: OR 1.15  [1.02 – 1.30], p=.018 | %mono: OR 1.16  [1.03 – 1.31], p=.015 |
| Fibrosis | %mono: OR 1.22  [1.10 – 1.35], p=.0001 | PY≥20: OR 2.36  [1.07 – 5.23], p=.033  %mono: OR 1.21  [1.10 – 1.34], p=.0001 | PY≥30: OR 2.11  [1.11 – 4.01], p=.022  %mono: OR 1.21  [1.10 – 1.34], p=.0002  DLCO<70*: OR 1.53  [0.97 – 2.41], p=.069 | %mono: OR 1.21  [1.10 – 1.34], p=.0001  DLCO<70*: OR 1.54 [0.96 – 2.48], p=.075 | %mono: OR 1.21  [1.10 – 1.34], p=.0001  DLCO<70*: OR 1.56  [0.96 – 2.55], p=.070 |
| RB | CS: OR 2.46  [1.32 – 4.63], p=.004  DLCO<70*: OR 1.68 [0.97 – 2.90], p=.064 | CS: OR 2.58  [1.36 – 4.89], p=.003  DLCO<70*: OR 1.75 [0.98 – 3.15], p=.058 | CS: OR 2.56  [1.36 – 4.89], p=.003  DLCO<70: OR 1.83  [1.05 – 3.17], p=.032 | CS: OR 2.73  [1.45 – 5.15], p=.001  DLCO<70: OR 1.83  [1.02 – 3.30], p=.042 | CS: OR 2.63  [1.40 – 4.94], p=.002  PY≥50: OR 2.24  [1.21 – 4.15], p=.010  DLCO<70: OR 1.76  [1.02 – 3.03], p=.041 |
| Emphysema | CS*: OR 1.78  [0.98 – 3.24], p=.057  PY≥10: OR 6.11  [2.95 – 12.65], p<.0001  %mono: OR 1.18  [1.04 – 1.33], p=.009 | CS: OR 1.90  [1.05 – 3.44], p=.034  PY≥20: OR 3.88  [2.14 – 7.03], p<.0001  %mono: OR 1.21  [1.07 – 1.36], p=.002  DLCO<70: OR 1.83  [1.08 – 3.12], p=.025 | CS: OR 2.00  [1.11 – 3.61], p=.021  PY≥30: OR 3.51  [2.04 – 6.03], p<.0001  %mono: OR 1.21  [1.07 – 1.36], p=.002  DLCO<70: OR 1.98  [1.17 – 3.35], p=.010 | CS: OR 2.03  [1.13 – 3.67], p=.018  PY≥40: OR 4.04  [2.32 – 7.04], p<.0001  %mono: OR 1.22  [1.08 – 1.37], p=.001  DLCO<70: OR 1.85  [1.09 – 3.14], p=.023 | CS: OR 2.34  [1.32 – 4.15], p=.003  PY≥50: OR 2.76  [1.47 – 5.20], p=.001  %mono: OR 1.25  [1.11 – 1.40], p=.002  DLCO<70: OR 2.09  [1.25 – 3.50], p=.004 |

Abbreviations: AAH= atypical adenomatous hyperplasia, OP= organizing pneumonia, PBM= peribronchiolar metaplasia, RB-ILD= respiratory bronchiolitis- interstitial lung disease

**Table S3: Univariate analysis of significant prognostic factors associated with mortality of the cohort (n=382)**

| Variables  Mean±SD or n (%) | Dead (n=81) | Alive (n=301) | p-value |
| --- | --- | --- | --- |
| Age | 68.2±9.3 | 65.4±10.2 | .028 |
| Never smoker | 3 (3.7) | 44 (14.6) | .002 |
| Ever smoker | 78 (96.3) | 253 (84) | .003 |
| Ex-smoker | 48 (59.3) | 131 (43.5) | .017 |
| Composite pack years | 55.7±36.2 | 41.3±33.1 | <.001 |
| Duration of smoking | 40.7±13.7 | 32.9±18.0 | <.001 |
| Comorbidities |  |  |  |
| COPD | 57 (70.4) | 168 (55.8) | .022 |
| Coronary artery disease | 40 (49.4) | 95 (31.5) | .004 |
| Atrial fibrillation | 19 (23.5) | 34 (11.3) | .010 |
| Chronic kidney disease | 15 (18.5) | 26 (8.6) | .015 |
| Gastro-esophageal reflux disease | 42 (51.9) | 113 (37.5) | .022 |
| Hypothyroidism | 8 (9.9) | 59 (19.6) | .047 |
| Other cancer history | 17 (21) | 25 (8.3) | .002 |
| PFT findings: |  |  |  |
| FEV1, % predicted | 69.7±19.8 | 78.2±21.7 | .002 |
| FVC, % predicted | 80.0±13.5 | 86.8±19.1 | .001 |
| Ratio FEV1/FVC | 65.2±12.8 | 68.9±11.8 | .023 |
| RV/TLC, % predicted | 134.7±26.6 | 123.5±26.4 | .004 |
| DLCO, % predicted | 62.7±17.0 | 71.2±21.3 | <.001 |
| Labs |  |  |  |
| Absolute monocyte, x102/µL | 7.7±2.3 | 6.4±2.0 | 0 |
| % Monocyte count | 10.2±3.2 | 8.4±2.3 | <.001 |
| Hemoglobin (g/dL) | 12.9±1.9 | 13.5±1.6 | .006 |
| Hematocrit (%) | 38.6±5.2 | 40.4±4.5 | .001 |
| Radiology findings |  |  |  |
| Any emphysema | 78 (96.3) | 243 (80.7) | <.001 |
| Centrilobular emphysema | 71 (87.6) | 220 (73.1) | <.001 |
| Interstitial lung disease pattern | 26 (32.1) | 45 (14.9) | .001 |
| Isolated honeycombing | 5 (6.2) | 4 (1.3) | .023 |
| Histology findings |  |  |  |
| Active lung cancer | 76 (93.8) | 252 (83.7) | .025 |
| Anthracosis | 58 (71.6) | 177 (58.8) | .040 |
| Honeycombing | 6 (7.4) | 5 (1.6) | .014 |

**Figure S1:**

Distribution of histologic findings (in %) among the groups with radiographic abnormalities (no disease, ILA only, emphysema only, ILA+ emphysema and ILD+ emphysema). All findings are significant for p-value (<0.05) except OP (p=0.178).

Abbreviations: AAH= atypical adenomatous hyperplasia, DIP= desquamative interstitial pneumonia, OP= organizing pneumonia, PBM= peribronchiolar metaplasia, RB-ILD= respiratory bronchiolitis-ILD, ILA= interstitial lung abnormality, ILD= interstitial lung disease.
